# Supplementary material
Source: publisher figshare collection journal article supplement (https://gsajournals.figshare.com/articles/dataset/_/7081094)
Supplement: Supplementary file 1 [file 2]

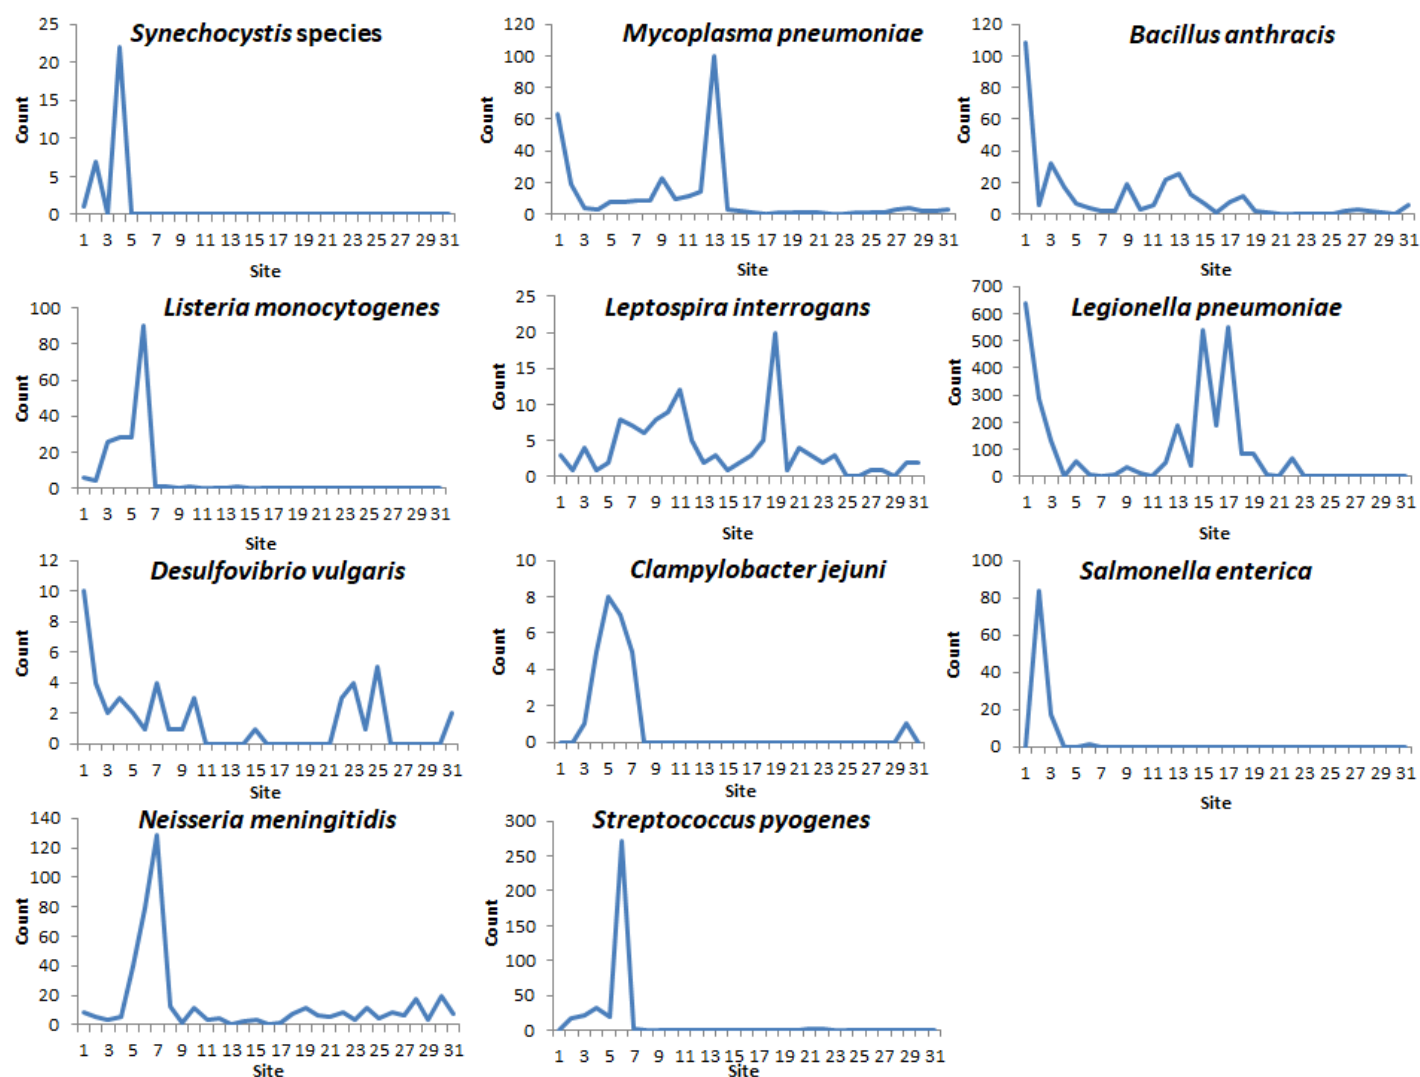

**Fig. S1.** Counts of 3' ends from RNA-Seq reads mapped to the genomic 16S rRNA. Site 1 corresponds with the terminal C in the canonical CCUCC aSD motif, and site 31 represents the 30<sup>th</sup> base downstream of CCUCC.
